# Supplementary material for: The Associations of Child’s Clinical Conditions and Behavioral Problems with Parenting Stress among Families of Preschool-Aged Children: 2018–2019 National Survey of Child Health
Source: MDPI journal article supplement (doi:10.3390/children9020241), 2022-02-11
Supplement: s1 [file s1]

## Supplementary Data

Supplementary Table S1. Prevalence of mental, emotional, developmental, and behavioral (MEDB) Problems in children aged 3-5 years. 2018-2019 National Survey of Child Health.

| Conditions                                                      | Prevalence (%) |
|-----------------------------------------------------------------|----------------|
| Tourette Syndrome                                               | 0.03           |
| Anxiety problems                                                | 1.85           |
| Depression                                                      | 0.14           |
| Behavioral and conduct problem                                  | 3.74           |
| Developmental delay                                             | 5.49           |
| Intellectual disability                                         | 0.51           |
| Speech or other language disorder                               | 8.91           |
| Learning disability                                             | 2.10           |
| ASD                                                             | 1.91           |
| ADD/ADHD                                                        | 1.76           |
| CSHCN screener-based mental, emotional, and behavioral problems | 5.13           |

ASD, Autism Spectrum Disorder; ADD/ADHD, Attention Deficit Disorder or Attention-Deficit/Hyperactivity Disorder; CSHCN, children with special health care needs.

Supplementary Table S2. The prevalence of elevated parenting stress according to the number of externalizing behavior problems in families of children aged 3-5 years. 2018-2019 National Survey of Child Health.

|                                                  | All          | Elevated<br>parenting stress | No parenting<br>aggravation  | p-value |
|--------------------------------------------------|--------------|------------------------------|------------------------------|---------|
|                                                  | Unweighted n | Unweighted n<br>(weighted %) | Unweighted n<br>(weighted %) |         |
| The number of externalizing<br>behavior problems |              |                              |                              | <0.01   |
| 0                                                | 5735         | 56 (1.4)                     | 5679 (98.6)                  |         |
| 1                                                | 1551         | 77 (5.1)                     | 1474 (94.9)                  |         |
| 2                                                | 579          | 103 (16.0)                   | 476 (84.0)                   |         |
| 3                                                | 215          | 69 (25.6)                    | 146 (74.4)                   |         |
| 4                                                | 104          | 51 (38.2)                    | 53 (61.8)                    |         |
| 5                                                | 39           | 30 (69.6)                    | 9 (30.4)                     |         |

Supplementary Table S3. Adjusted odds ratios of elevated parenting stress in mothers and fathers of children aged 3-5 years. 2018-2019 National Survey of Child Health.

|                                 | Mother respondents (n=5,685) | Father respondents (n=2,551) |
|---------------------------------|------------------------------|------------------------------|
|                                 | AOR (95% CI)                 | AOR (95% CI)                 |
| Child sex                       |                              |                              |
| Male                            | 1.1 (0.6, 2.0)               | 1.3 (0.7, 2.5)               |
| Female                          | Reference                    | Reference                    |
| Family income                   |                              |                              |
| FPL<100 (below poverty)         | 1.2 (0.6, 2.4)               | 2.3 (0.9, 5.6)               |
| FPL≥100                         | Reference                    | Reference                    |
| SHCN                            |                              |                              |
| Yes                             | 2.3 (1.2, 4.3)               | 2.3 (1.1, 4.7)               |
| No                              | Reference                    | Reference                    |
| MEDB problems                   |                              |                              |
| Yes                             | 4.5 (2.0, 9.8)               | 7.0 (3.4, 14.3)              |
| No                              | Reference                    | Reference                    |
| Externalizing behavior problems |                              |                              |
| Yes                             | 5.2 (2.6, 10.6)              | 5.8 (2.7, 12.5)              |
| No                              | Reference                    | Reference                    |

AOR, adjusted odds ratio; CI, confidence interval; FPL, federal poverty level; MEDB, mental, emotional, developmental, or behavioral problem; SHCN, special health care needs.
